# Supplementary material for: Dental Solid Waste Analysis: A Scoping Review and Research Model Proposal
Source: MDPI journal article supplement (doi:10.3390/app14052026), 2024-02-29
Supplement: s1 [file s1]

Archive with 2 entries (2 files):
- applsci-2865676-Table S1.pdf
- supplementary S2.pdf
